# Supplementary material for: Cubic mesoporous Pd–WO3 loaded graphitic carbon nitride (g-CN) nanohybrids: highly sensitive and temperature dependent VOC sensors
Source: Royal Society of Chemistry journal article supplement (doi:10.1039/c8ta02702a), 2018-01-01
Supplement: c8ta02702a1.pdf [file c8ta02702a1.pdf]

**Note added after first publication:** this version of the Electronic Supplementary Information published on 21<sup>st</sup> September 2020 replaces the original version published on 4<sup>th</sup> May 2018, to amend the author list and affiliations in accordance with a recently-published Correction (DOI: 10.1039/D0TA90214D).

## **Electronic Supplementary Information (ESI) for**

**Cubic mesoporous Pd-WO<sub>3</sub> loaded graphitic carbon nitride (g-CN) nano hybrids: highly sensitive and temperature dependent VOCs sensors**

**Ritu Malik<sup>a</sup>, Vijay K. Tomer<sup>b,\*</sup>**

<sup>a</sup> Department of Physics, D.C.R. University of Science & Technology, Murthal 131039, Haryana, India

<sup>b</sup> Department of Materials Science & Nanotechnology, D.C.R. University of Science & Technology, Murthal 131039, Haryana, India

**Keywords:** carbon nitrides, nanocasting, mesoporous, temperature dependant, sensors

**\* Corresponding author**

E-mail: [vjtomer@gmail.com](mailto:vjtomer@gmail.com) (Vijay K. Tomer)

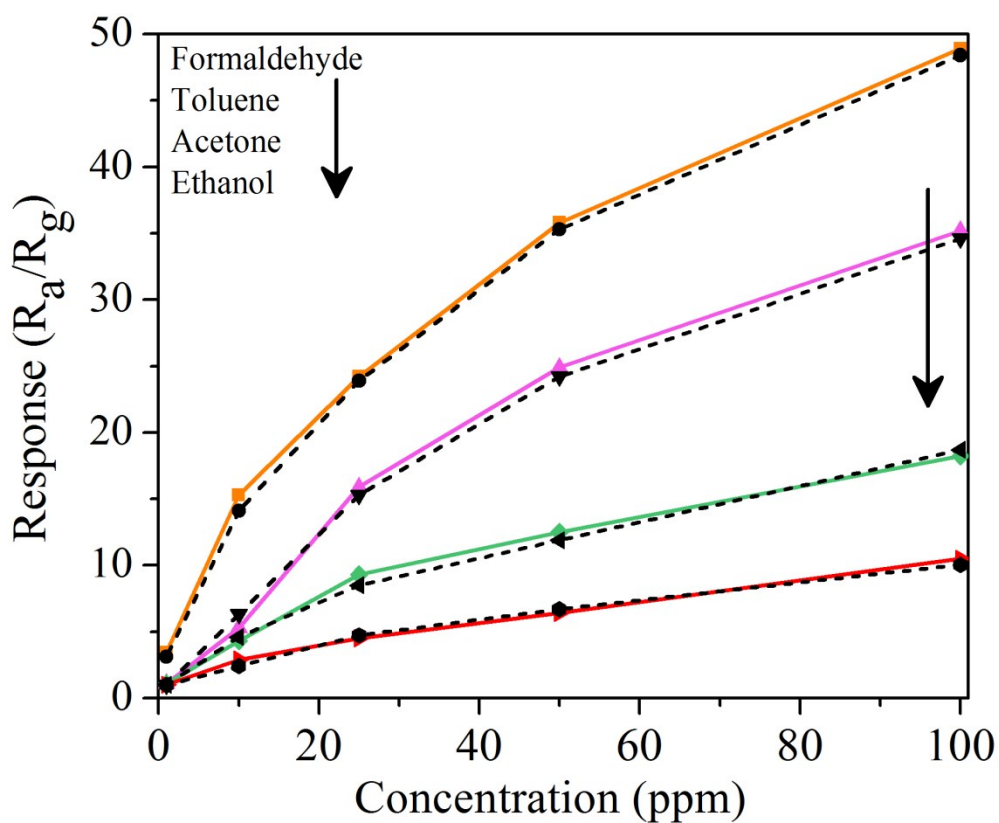

**Figure S1:** Comparison of sensing performance of Pd-WO<sub>3</sub>/g-CN for test VOCs measured using Ag-Pd IDE (—) and ceramic substrate (- - -) measured at 120 °C.

**Table ST1:** Formaldehyde concentration measurement inside the gas chamber using Drager's tube

| Injected concentration of formaldehyde (ppm) | Formaldehyde detected inside the chamber using Drager's tube (ppm) |           |
|----------------------------------------------|--------------------------------------------------------------------|-----------|
|                                              | Day 0                                                              | Day 5     |
| 5                                            | 5 ± 0.35                                                           | 5 ± 0.36  |
| 10                                           | 10 ± 0.18                                                          | 10 ± 0.3  |
| 25                                           | 25 ± 0.3                                                           | 25 ± 0.24 |

**Table ST2:** A comparison of formaldehyde sensing performance of previously published works.

| S. No. | Material                                           | Morphology/Synthesis route                                       | Concentration (ppm) | Operating temperature (°C) | Response        | Response/Recovery time (s/s)     | Ref              |
|--------|----------------------------------------------------|------------------------------------------------------------------|---------------------|----------------------------|-----------------|----------------------------------|------------------|
| 1      | SnO <sub>2</sub>                                   | Nanosheets/hydrothermal                                          | 100                 | 240                        | 7               | 1/6                              | 1                |
| 2      | SnO <sub>2</sub> /Zn <sub>2</sub> SnO <sub>4</sub> | Nanorods/ hydrothermal                                           | 1000                | 162                        | 83.8            | 35/78                            | 2                |
| 3      | SnO <sub>2</sub> /graphene                         | Mesoporous/solvothermal                                          | 100                 | 120                        | 45 <sup>#</sup> | 1/85<br>(1 ppm)                  | 3                |
| 4      | NiO/Sn                                             | 3-D ordered mesoporous/<br>colloidal crystal template            | 100                 | 225                        | 145             | 30/160                           | 4                |
| 5      | NiO                                                | Flower/solvothermal                                              | 100                 | 200                        | 3.5             | 30/56                            | 5                |
| 6      | Ag/Al-ZnO                                          | Macro-mesoporous/one step<br>solution combustion method          | 100                 | 240                        | 87.6            | 47/5                             | 6                |
| 7      | Au-ZnO                                             | Single crystalline nanoplates/<br>hydrothermal + photodeposition | 50                  | 360                        | 23 <sup>#</sup> | N.D.                             | 7                |
| 8      | Ag/LaFeO <sub>3</sub>                              | Cage like/ hydrothermal +<br>chemical synthesis                  | 1                   | 70                         | 23              | 20/30                            | 8                |
| 9      | Sr/In <sub>2</sub> O <sub>3</sub>                  | Hollow submicrospheres/<br>solvothermal                          | 100                 | 200                        | 9.4             | 43 <sup>#</sup> /12 <sup>#</sup> | 9                |
| 10     | Zn/SnO <sub>2</sub>                                | Microspheres/solvothermal                                        | 100                 | 160                        | 15.2            | 2/2                              | 10               |
| 11     | Ag/Co <sub>3</sub> O <sub>4</sub>                  | Microspheres/hydrothermal                                        | 20                  | 90                         | 17.25           | N.D.                             | 11               |
| 12     | SnO <sub>2</sub> /In <sub>2</sub> O <sub>3</sub>   | Nanotubes/electrospinning                                        | 50                  | 300                        | 118             | 60/97                            | 12               |
| 13     | Ag/LaFeO <sub>3</sub>                              | Nanocomposite/molecular<br>imprinting technique                  | 2                   | 125                        | 25 <sup>#</sup> | 90/80                            | 13               |
| 14     | CuO-TiO <sub>2</sub>                               | Nanofiber/electrospinning +<br>hydrothermal                      | 10                  | 200                        | 5 <sup>#</sup>  | 1.4/24.8                         | 14               |
| 15     | Au@In <sub>2</sub> O <sub>3</sub>                  | Core shell/ hydrothermal + aging                                 | 100                 | 200                        | 17              | 7/135                            | 15               |
| 16     | NiO                                                | Ordered mesoporous/<br>hydrothermal + nanocasting                | 100                 | 300                        | 10 <sup>#</sup> | 119/39<br>(390 ppm)              | 16               |
| 17     | <b>Pd-WO<sub>3</sub>/g-CN</b>                      | <b>Ordered mesoporous/<br/>hydrothermal + nanocasting</b>        | <b>25</b>           | <b>120</b>                 | <b>24.2</b>     | <b>6.8/4.5</b>                   | <b>This work</b> |

# Estimated

**Table ST3:** A comparison of toluene sensing performance of previously published works

| S. No | Material                                           | Morphology/Synthesis route                                | Concentration (ppm) | Operating temperature (°C) | Response                     | Response/Recovery time (s/s) | Ref              |
|-------|----------------------------------------------------|-----------------------------------------------------------|---------------------|----------------------------|------------------------------|------------------------------|------------------|
| 1     | SnO <sub>2</sub>                                   | Yolk shell cuboctahedra/<br>Chemical Synthesis            | 20                  | 250                        | 28.6                         | 1.8/4.1                      | 17               |
| 2     | Au/WO <sub>3</sub>                                 | Nanosheets/hydrothermal                                   | 100                 | 300                        | 50                           | 2/9                          | 18               |
| 3     | NiO/SnO <sub>2</sub>                               | Nanofibers/ Electrospinning                               | 50                  | 330                        | 11                           | 11.2/4                       | 19               |
| 4     | SnO <sub>2</sub> /Fe <sub>2</sub> O <sub>3</sub>   | Nanotubes/Chemical synthesis                              | 50                  | 260                        | 25.3 (50 ppm)<br>3.9 (1 ppm) | --<br>5/11                   | 20               |
| 5     | ZnO                                                | Flower like/Hydrothermal                                  | 100                 | 350                        | 42.6                         | 53/151                       | 21               |
| 6     | Au/ZnO                                             | Nanowires/Chemical synthesis                              | 50                  | 340                        | 7.5*                         | 45/39                        | 22               |
| 7     | rGO/Co <sub>3</sub> O <sub>4</sub>                 | Nanosheets/Hydrothermal                                   | 5                   | 110                        | 11.3                         | >150/>180*                   | 23               |
| 8     | rGO/polyethylene oxide                             | Thin film/Chemical synthesis                              | 80                  | Room temperature           | 0.03 <sup>#</sup>            | 127/143                      | 24               |
| 9     | Co <sub>3</sub> O <sub>4</sub>                     | Nanosheets/Chemical synthesis                             | 100                 | 150                        | 6.08                         | 150/200*                     | 25               |
| 10    | α-Fe <sub>2</sub> O <sub>3</sub> /SnO <sub>2</sub> | Heterostructure/Ultrasonic spray<br>pyrolysis             | 100                 | 90                         | 49.7 <sup>#</sup>            | 25/20*                       | 26               |
| 11    | SnO <sub>2</sub>                                   | Nanofibers/Electrospinning                                | 100                 | 350                        | 6                            | 1/5                          | 27               |
| 12    | α-Fe <sub>2</sub> O <sub>3</sub> /SnO <sub>2</sub> | Core-shell nanotubes/<br>Hydrothermal                     | 100                 | 300                        | 4.2                          | --                           | 28               |
| 13    | <b>Pd-WO<sub>3</sub>/g-CN</b>                      | <b>Ordered mesoporous/<br/>hydrothermal + nanocasting</b> | <b>25</b>           | <b>120</b>                 | <b>21.7</b>                  | <b>7.2/4.9</b>               | <b>This work</b> |

\* Estimated value

<sup>#</sup> Response = (R<sub>g</sub>-R<sub>a</sub>)/R<sub>a</sub>**Table ST4:** A comparison of acetone sensing performance of previously published works

| S. No | Material                                               | Morphology/Synthesis route                                | Concentration (ppm) | Operating temperature (°C) | Response    | Response/Recovery time (s/s) | Ref              |
|-------|--------------------------------------------------------|-----------------------------------------------------------|---------------------|----------------------------|-------------|------------------------------|------------------|
| 1     | La/SnO <sub>2</sub>                                    | Layered nanoarray/ hydrothermal                           | 200                 | 300                        | 70          | 48/56                        | 29               |
| 2     | SnO <sub>2</sub>                                       | Hollow microspheres /<br>hydrothermal                     | 50                  | 200                        | 15          | 5/7                          | 30               |
| 3     | Pt/WO <sub>3</sub>                                     | Hemitubes / Sputter deposition                            | 2                   | 300                        | 4.11        | --                           | 31               |
| 4     | Y-SnO <sub>2</sub>                                     | Nanobelt/ Thermal evaporation                             | 100                 | 210                        | 11.4        | 9-25/10-30                   | 32               |
| 5     | SnO <sub>2</sub>                                       | Hollow nanobelt/ Single<br>capillary electrospinning      | 100                 | 260                        | 52.7        | 46/10<br>(10 ppm)            | 33               |
| 6     | Au/WO <sub>3</sub>                                     | Nanorods/ Thermal evaporation                             | 200                 | 300                        | 132         | 98/91                        | 34               |
| 7     | Ce-SnO <sub>2</sub>                                    | Hollow spheres/ Chemical<br>synthesis                     | 100                 | 250                        | 11.9        | 18/7                         | 35               |
| 8     | WO <sub>3</sub>                                        | Nanotubes/ Electrospinning                                | 40                  | 250                        | 19.7        | 5/22                         | 36               |
| 9     | Eu-SnO <sub>2</sub>                                    | Nanofibers/ Electrospinning                               | 100                 | 280                        | 32.2        | 4/3                          | 37               |
| 10    | Au/SnO <sub>2</sub>                                    | Hollow microspheres/<br>Hydrothermal                      | 5                   | 220                        | 3.1         | 0.9/21                       | 38               |
| 11    | α-Fe <sub>2</sub> O <sub>3</sub> /<br>SnO <sub>2</sub> | Nanofibers/ Electrospinning                               | 100                 | 275                        | 5.3         | 1.5/2.5                      | 39               |
| 12    | Au@TiO <sub>2</sub> -<br>SnO <sub>2</sub>              | Flower-like/ Hydrothermal                                 | 100                 | 220                        | 43          | 6.5/8                        | 40               |
| 13    | <b>Pd-WO<sub>3</sub>/g-CN</b>                          | <b>Ordered mesoporous/<br/>hydrothermal + nanocasting</b> | <b>25</b>           | <b>120</b>                 | <b>21.3</b> | <b>8.1/7.1</b>               | <b>This work</b> |

## References

1. H. Yu, T. Yang, R. Zhao, B. Xiao, Z. Li and M. Zhang, *RSC Adv.*, 2015, **5**, 104574
2. X. Xiao, X. Xing, B. Han, D. Deng X. Cai and Y. Wang, *RSC Adv.*, 2015, **5**, 42628
3. S. Chen, Y. Qiao, J. Huang, H. Yao, Y. Zhang, Y. Li, J. Du and W. Fan, *RSC Adv.*, 2016, **6**, 25198
4. Z. Wang, H. Zhou, D. Han and F. Gu, *J. Mater. Chem. C*, 2017, **5**, 3254
5. X. San, G. Zhao, G. Wang, Y. Shen, D. Meng, Y. Zhang and F. Meng, *RSC Adv.*, 2017, **7**, 3540
6. X. Xing, Y. Li, D. Deng, N. Chen, X. Liu, X. Xiao and Y. Wang, *RSC Adv.*, 2016, **6**, 101304
7. X. Han, Y. Sun, Z. Feng, G. Zhang, Z. Chen and J. Zhan, *RSC Adv.*, 2016, **6**, 37750
8. Y. Zhang, J. Zhang, J. Zhao, Z. Zhu and Q. Liu, *Phys. Chem. Chem. Phys.*, 2017, **19**, 6973
9. X. Shen, L. Guo, G. Zhu, C. Xi, Z. Ji and H. Zhou, *RSC Adv.*, 2015, **5**, 64228
10. Y. Wang, D. Jiang, W. Wei, L. Zhu, L. Shen, S. Wen and S. Ruan, *RSC Adv.*, 2015, **5**, 50336
11. S. Bai, H. Liu, J. Sun, Y. Tian, R. Luo, D. Li and A. Chen, *RSC Adv.*, 2015, **5**, 48619
12. J. Liu, X. Li, X. Chen, H. Niu, X. Han, T. Zhang, H. Lin and F. Qu, *New J. Chem.*, 2016, **40**, 1756
13. Y. Zhang, Q. Liu, J. Zhang, Q. Zhu and Z. Zhu, *J. Mater. Chem. C*, 2014, **2**, 10067
14. J. Deng, L. Wang, Z. Lou and T. Zhang, *J. Mater. Chem. A*, 2014, **2**, 9030
15. X. Li, J. Liu, H. Guo, X. Zhou, C. Wang, P. Sun, X. Hu and G. Lu, *RSC Adv.*, 2015, **5**, 545
16. X. Lai, G. Shen, P. Xue, B. Yan, H. Wang, P. Li, W. Xia and J. Fang, *Nanoscale*, 2015, **7**, 4005
17. Y. Bing, C. Liu, L. Qiao, Y. Zeng, S. Yu, Z. Liang, J. Liu, J. Luo and W. Zheng, *Sens. Actuators B*, 2016, **231**, 365
18. F. Li, C. Li, L. Zhu, W. Guo, L. Shen, S. Wen and S. Ruan, *Sens. Actuators B*, 2016, **223**, 761
19. L. Liu, Y. Zhang, G. Wang, S. Li, L. Wang, Y. Han, X. Jiang and A. Wei, *Sens. Actuators B*, 2011, **160**, 448
20. H. Shan, C. Liu, L. Liu, J. Zhang, H. Li, Z. Liu, X. Zhang, X. Bo and X. Chi, *ACS Appl. Mater. Interfaces*, 2013, **5**, 6376
21. W. Tang and J. Wang, *Sens. Actuators B*, 2015, **207**, 66
22. L. Wang, S. Wang, M. Xu, X. Hu, H. Zhang, Y. Wang and W. Huang, *Phys. Chem. Chem. Phys.*, 2013, **15**, 17179
23. S. Bai, L. Du, J. Sun, R. Luo, D. Li, A. Chen and C. –C. Liu, *RSC Adv.*, 2016, **6**, 60109

24. Y. Su, G. Xie, J. Chen, H. Du, H. Zhang, Z. Yuan, Z. Ye, X. Du, H. Tai and Y. Jiang, *RSC Adv.*, 2016, **6**, 97840
25. C. Zhao, B. Huang, J. Zhou and E. Xie, *Phys. Chem. Chem. Phys.*, 2014, **16**, 19327
26. T. Wang, Z. Huang, Z. Yu, B. Wang, H. Wang, P. Sun, H. Suo, Y. Gao, Y. Sun, T. Li and G. Lu, *RSC Adv.*, 2016, **6**, 52604
27. Q. Qi, T. Zhang, L. Liu and X. Zheng, *Sens. Actuators B*, 2009, **137**, 471
28. Q. Yu, J. Zhu, Z. Xu and X. Huang, *Sens. Actuators B*, 2015, **213**, 27
29. F. Gao, G. H. Qin, Y. H. Li, Q. P. Jiang, L. Luo, K. Zhao, Y. J. Liu and H. Y. Zhao, *RSC Adv.*, 2016, **6**, 10298
30. J. Li, P. Tang, J. Zhang, Y. Feng, R. Luo, A. Chen and D. Li, *Ind. Eng. Chem. Res.*, 2016, **55**, 3588
31. S.J. Choi, I. Lee, B.H. Jang, D. Y. Youn, W.H. Ryu, C.O. Park and I.D. Kim, *Anal. Chem.*, 2013, **85**, 1792
32. X. Li, Y. Liu, S. Li, J. Huang, Y. Wu and D. Yu, *Nanoscale Research Lett*, 2016, **11**, 470
33. W.Q. Li, S.Y. Ma, J. Luo, Y.Z. Mao, L. Cheng, D.J. Gengzang, X.L. Xu and S.H. Yan, *Mater. Lett.*, 2014, **132**, 338
34. S. Kim, S. Park, S. Park and C. Lee, *Sens. Actuators B*, 2015, **209**, 180
35. P. Song, Q. Wang and Z. Yang, *Sens. Actuators B*, 2012, **173**, 839
36. X. Chi, C. Liu, L. Liu, Y. Li, Z. Wang, X. Bo, L. Liu and C. Su, *Sens. Actuators B*, 2014, **194**, 33
37. Z. Jiang, R. Zhao, B. Sun, G. Nie, H. Ji, J. Lei and C. Wang, *Ceram. Int.*, 2016, **42**, 15881
38. Y. Li, L. Qiao, D. Yan, L. Wang, Y. Zeng and H. Yang, *J. Alloys Compounds*, 2014, **586**, 399
39. X. Li, H. Zhang, C. Feng, Y. Sun, J. Ma, C. Wang and G. Lu, *RSC Adv.*, 2014, **4**, 27552
40. R. Malik, V. K. Tomer, V. Chaudhary, M. S. Dahiya, S.P. Nehra, P. S. Rana and S. Duhan, *Chem. Select*, 2016, **1**, 3247
